# Supplementary material
Source: PubMed Central journal article supplement (PMC6102991)
Supplement: zam017188706s1.pdf [file zam017188706s1.pdf]

1 **Supplementary Information**

2

3 **Widely used benzalkonium chloride disinfectants can promote antibiotic resistance**

4

5 Minjae Kim, Michael R. Weigand, Seungdae Oh, Janet K. Hatt, Raj Krishnan, Ulas

6 Tezel, Spyros G. Pavlostathis, and Konstantinos T. Konstantinidis.

7

8

9

10

11

12

13

14

15

16

17

18

19

20

21

22

23

## 24 **Supporting results and discussion**

### 25 **Integrative and conjugative elements (ICEs)**

26           In contrast to plasmids, ICEs can be integrated into the host chromosome via phage  
27 integrase-mediated chromosomal integration at specific sites encoding tRNA genes (1). In  
28 GI-2, we found a tyrosine-based site-specific recombinase CMGI-2, and a tRNA<sup>Gly</sup>, which  
29 was located 80 bp upstream of GI-2 and overlapped, over 22bp, with a sequence that was  
30 duplicated at the other end of GI-2 (Supplementary Fig. 3). These results suggested that  
31 tyrosine-based recombinase might have catalyzed the site-specific integration of GI-2 in *P.*  
32 *aeruginosa* DPB. However, GI-2 also harbored a transposase DDE domain protein, which  
33 is known to employ various mechanisms of recombination with promiscuous integration  
34 sites (2), indicating that non-site-specific integration is also possible for this ICE.  
35 Furthermore, the presence of plasmid replication initiator (*repA*) in GI-2 suggested that GI-  
36 2 may be also prone to plasmid-like replication, similar to several other known ICEs (3),  
37 which blur the line dividing ICEs and conjugative plasmids.

38

### 39 **BAC-adaptation in *P. aeruginosa***

40           In contrast to all *P. aeruginosa* DP BAC(+) populations, *P. aeruginosa* DPB  
41 BAC(+) and BAC(-) populations did not showed higher MIC to the membrane-active  
42 antibiotic polymyxin B except for DPB BAC(+)\_1 compared to the ancestor even though  
43 they all had mutations in *pmrB*, albeit at different locations than DP BAC(+) (Table 2 and  
44 Supplementary Table 3B). The mutations to *pmrB* in DPB BAC(+) and BAC(-)  
45 populations apparently did not affect their polymyxin B resistance level relative to their  
46 ancestor (but only their BAC tolerance level) because the level of polymyxin resistance

47 depends on the type of mutation in *pmrB* (e.g., exact location and combinations of  
48 mutation) and possibility of presence of other determinants for resistance phenotype (4).  
49 For instance, repeated passages without polymyxin in the growth media results in loss of  
50 resistance in some cases, suggesting that the *pmrAB* locus is not the only determinant of  
51 the resistance phenotype (4). These other (unknown) determinants and their epistatic  
52 effects on the mutation on the *pmrB* gene presumably accounted for the lack of increased  
53 polymyxin B resistance in DPB BAC(+) populations. Consistent with these interpretations,  
54 we found that the expression level of *arnBCADTEF* operon under BAC-free (but not under  
55 BAC-exposed) conditions in all DPB BAC(+) populations was not significantly different  
56 from that of their ancestor, and almost no expression of *arnE* and *arnF* (Supplementary  
57 Table 6A). However, when BAC was added to the growth media before taking the sample  
58 for transcriptomics, overexpression of *arnBCADT* and almost no expression of *arnE* and  
59 *arnF* were observed (Supplementary Table 6B). *arnE* and *arnF* are presumably responsible  
60 for transportation of undecaprenyl phosphate- $\alpha$ -L-Ara4N from inner membrane to outer  
61 surface (5), which is required for the last step of the synthesis of L-Ara4N modified lipidA.  
62 Therefore, it appears that, at least in *P. aeruginosa* DPB, overexpression of *arnBCAD*  
63 produces undecaprenyl phosphate- $\alpha$ -L-Ara4N in the inner membrane, which is important  
64 for increased BAC tolerance but not relevant for conferring polymyxin B resistance; the  
65 latter apparently requires the transportation of the undecaprenyl phosphate- $\alpha$ -L-Ara4N to  
66 the outer membrane. And, incomplete expression of *arnBCADTEF* operon, especially *arnE*  
67 and *arnF*, presumably accounted for the fact that DPB BAC(+) populations did not show  
68 increased polymyxin B resistance under BAC exposed condition compared to their  
69 ancestor (Supplementary Table 3C). Consistent with these findings and interpretations, the

70 DPB BAC(-)\_1 population, which showed decreased BAC tolerance relative to the other  
71 two *P. aeruginosa* DPB BAC(-) replicate populations, had 20bp insertion mutation in  
72 *pmrA*, and consequently the expression level of *arnBCADTEF* operon was not different  
73 from that of ancestor or control under the BAC-exposed condition (Supplementary Table  
74 4D and 6C).

75 All *P. aeruginosa* DP BAC(-) populations showed loss of polymyxin B resistance  
76 relative to DP BAC(+) populations even though they had fixed mutations in *pmrB* (Figure  
77 3A and Table 2). Read alignment of DP BAC(-) datasets against assembled contigs of *P.*  
78 *aeruginosa* DP ancestor suggested that subpopulations of *P. aeruginosa* DP BAC(-)\_2 and  
79 DP BAC(-)\_3 had different mutations in *pmrB* and *pmrA* compared to those in *P.*  
80 *aeruginosa* DP BAC(+) populations (Supplementary Table 5). This finding may explain  
81 the loss of polymyxin B resistance in these populations since the location and combination  
82 of mutations in *pmrB* are known to affect the level of polymyxin B resistance (discussed  
83 above). In the case of population *P. aeruginosa* DP BAC(-)\_1, which did not have the  
84 mutations in *pmrB* or *pmrA* that *P. aeruginosa* DP BAC(-)\_2 and BAC(-)\_3 had, it is likely  
85 that mutations elsewhere in the genome during the BAC(-) phase were responsible for loss  
86 of polymyxin B resistance. For instance, this population uniquely had a 15bp insertion  
87 mutation in the quorum sensing regulator gene *lasR* (Supplementary Table 4C). Expression  
88 of more than 300 genes, including MFS transporters, RND efflux pump genes, and two-  
89 component response regulators, are regulated by two acyl-homoserine lactone systems,  
90 LasR-LasI and RhlR-RhlI (6, 7). Therefore, it is likely that the mutation in *lasR* might have  
91 induced expression changes in the genes related to polymyxin B resistance in *P. aeruginosa*  
92 BAC(-)\_1 population, although this hypothesis awaits experimental validation. In

93 summary, BAC exposure selected for the mutations in *pmrB* that conferred increased BAC-  
94 tolerance in all *P. aeruginosa* populations, but only specific mutations conferred increased  
95 polymyxin resistance in the DP (but not the DPB) genetic background. For the remaining  
96 of mutations, gene expression data provided testable hypotheses for explaining the lack of  
97 increased polymyxin B resistance.

## References

1. **Grindley ND, Whiteson KL, Rice PA.** 2006. Mechanisms of site-specific recombination. *Annu. Rev. Biochem.* **75**:567-605.
2. **Hickman AB, Chandler M, Dyda F.** 2010. Integrating prokaryotes and eukaryotes: DNA transposases in light of structure. *Critical reviews in biochemistry and molecular biology* **45**:50-69.
3. **Lee CA, Babic A, Grossman AD.** 2010. Autonomous plasmid - like replication of a conjugative transposon. *Molecular microbiology* **75**:268-279.
4. **Moskowitz SM, Brannon MK, Dasgupta N, Pier M, Sgambati N, Miller AK, Selgrade SE, Miller SI, Denton M, Conway SP.** 2012. PmrB mutations promote polymyxin resistance of *Pseudomonas aeruginosa* isolated from colistin-treated cystic fibrosis patients. *Antimicrobial agents and chemotherapy* **56**:1019-1030.
5. **Yan A, Guan Z, Raetz CR.** 2007. An undecaprenyl phosphate-aminoarabinose flippase required for polymyxin resistance in *Escherichia coli*. *Journal of Biological Chemistry* **282**:36077-36089.
6. **Schuster M, Lostroh CP, Ogi T, Greenberg E.** 2003. Identification, timing, and signal specificity of *Pseudomonas aeruginosa* quorum-controlled genes: a transcriptome analysis. *Journal of bacteriology* **185**:2066-2079.
7. **Wagner VE, Bushnell D, Passador L, Brooks AI, Iglewski BH.** 2003. Microarray analysis of *Pseudomonas aeruginosa* quorum-sensing regulons: effects of growth phase and environment. *Journal of bacteriology* **185**:2080-2095.

## Supplementary Figures and Tables

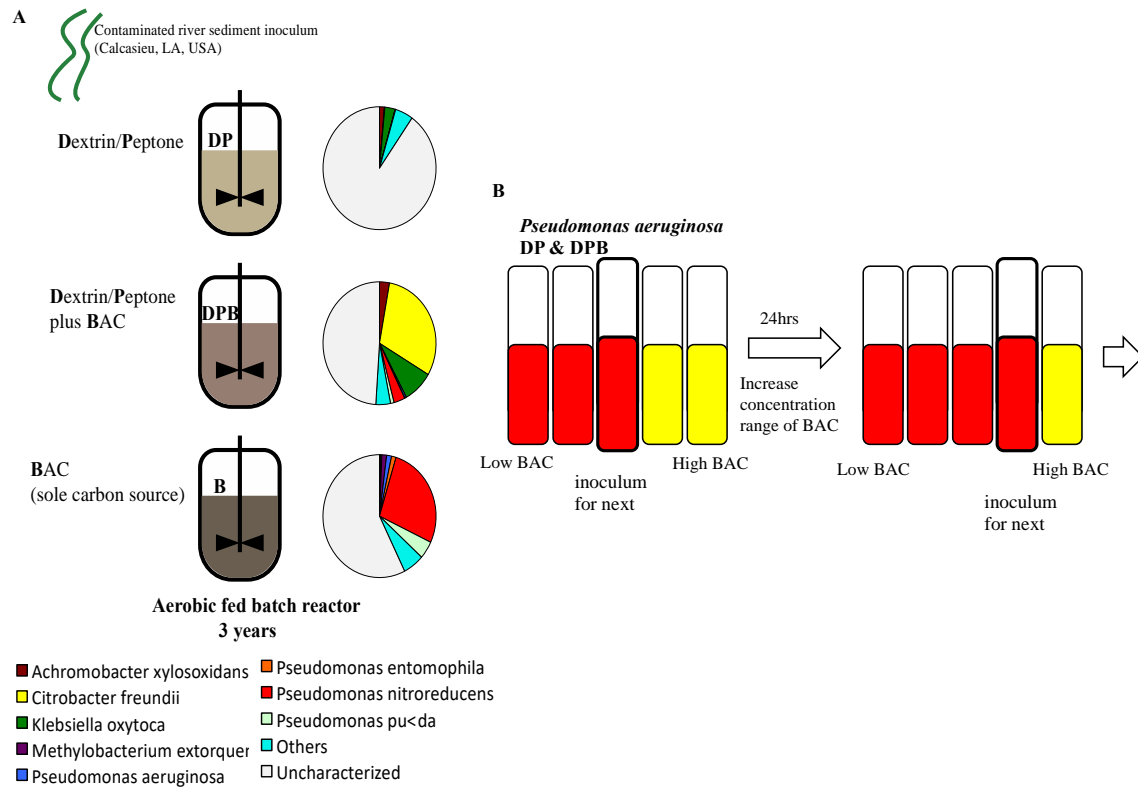

**Figure S1. | Bioreactor development and adaptive evolution experiment.** (A) Bioreactors were built with a microbial community inoculum originating from a river sediment (Calcasieu River, USA). The substrates and community ages for each bioreactor are shown. Colors represent the abundant community members, making >1% of the total (see figure key). (B) Schematic representation of the adaptive evolution experimental design. 1% aliquot from the culture that showed a ratio higher than 0.2 of relative growth compared to the control (measured by optical density; red test tubes) for the highest concentration of BAC tested was used as inoculum for the next round with higher BAC concentrations. Yellow tubes denote no growth (due to toxicity by the BAC concentration).

A

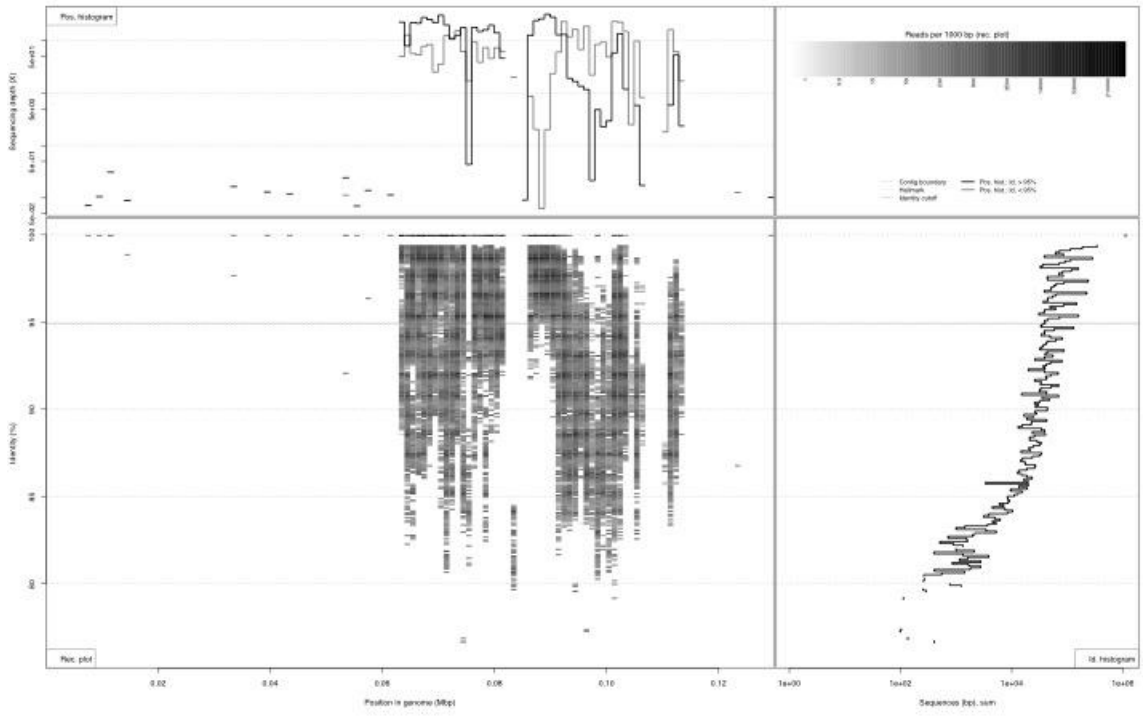



B

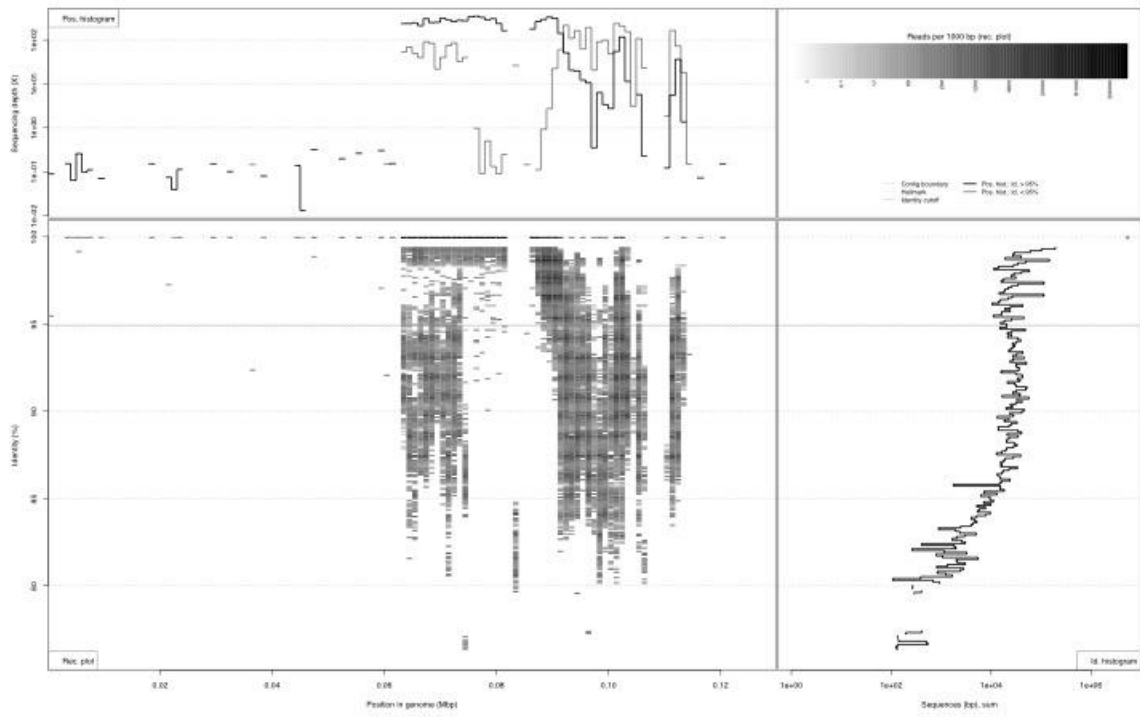



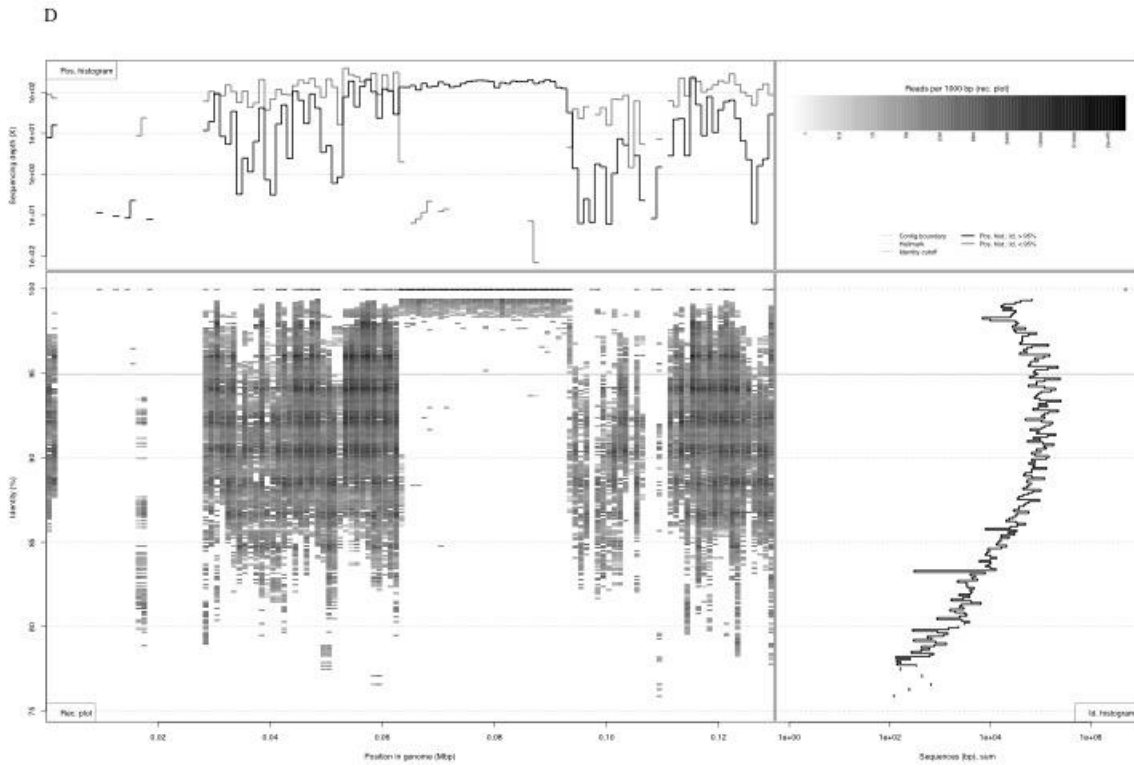

**Figure S2. | Fragment recruitment plots of reads of isolate genomes against the *P. aeruginosa* strain DPB GI-2 reference sequence.** The fragment recruitment plot consists of four panels: (1) Bottom left panel represents the individual reads recruited against GI-2, placed by location (x-axis) and percent of identity (y-axis) to GI-2 sequence; (2) Top left panel represents sequencing depth across the reference GI-2 sequence, i.e., number of times each nucleotide base of the reference is covered by reads, in logarithmic scale; (3) Bottom right panel represents identity histogram of mapping reads, i.e., how many bases are found at each value of nucleotide identity, in logarithmic scale; and (4) Top right panel represents color scale for the number of stacked reads in bottom left panel. Panels represent reads from: (A) *K. michiganensis* DPB, (B) *Citrobacter freundii* DPB, (C) *Achromobacter sp.* DPB, and (D) *Achromobacter sp.* B.

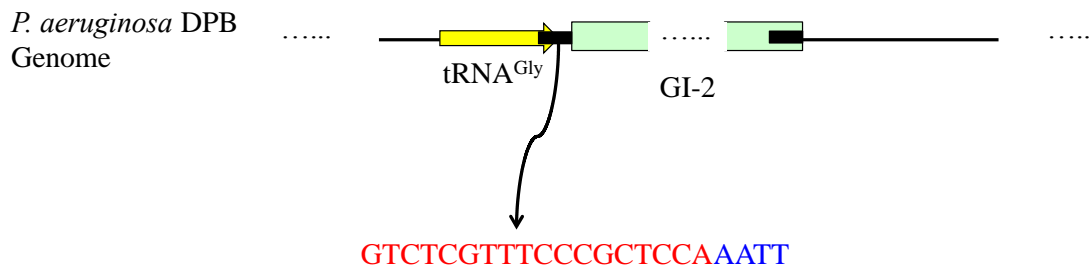

**Figure S3. | Schematic representation of the region where the GI-2 element was integrated in the *P. aeruginosa* DPB genome.** The yellow arrow indicates the sequence of the tRNA<sup>Gly</sup> gene. The black rectangles indicate identical short repeated sequences (22 bp) that most likely belong to the *attB* integration site i.e., red-colored nucleotide bases are 100% identical to the tRNA gene while the blue ones do not match the tRNA gene sequence.

**Table S1. Gene content of GI-2.** Gray shading highlights the genes encoding defining features of integrative and conjugative elements (ICEs). Gene sequences can be found at <http://enve-omics.ce.gatech.edu/data/bac>

| Gene ID | Bioinformatics-based Functional Annotation                                                                |
|---------|-----------------------------------------------------------------------------------------------------------|
| 1_2121  | MULTISPECIES: integrase [Proteobacteria]                                                                  |
| 1_2122  | MULTISPECIES: dye-decolorizing peroxidase (DyP),encapsulated subgroup [Proteobacteria]                    |
| 1_2123  | MULTISPECIES: hypothetical protein [Proteobacteria]                                                       |
| 1_2124  | MULTISPECIES: LysR family transcriptional regulator [Proteobacteria]                                      |
| 1_2125  | MULTISPECIES: formaldehyde dehydrogenase glutathione-independent [Proteobacteria]                         |
| 1_2126  | PREDICTED: protocadherin-12 [Jaculus jaculus]                                                             |
| 1_2127  | LysR family transcriptional regulator [Pseudomonas aeruginosa]                                            |
| 1_2128  | Transposase DDE domain protein (TnpA) [Pseudomonas aeruginosa]                                            |
| 1_2129  | MULTISPECIES: excinuclease ABC subunit UvrB [Proteobacteria]                                              |
| 1_2130  | MULTISPECIES: LysR family transcriptional regulator [Proteobacteria]                                      |
| 1_2131  | MULTISPECIES: hypothetical protein [Proteobacteria]                                                       |
| 1_2132  | MULTISPECIES: GNAT family acetyltransferase [Proteobacteria]                                              |
| 1_2133  | MULTISPECIES: nitrilase [Proteobacteria]                                                                  |
| 1_2134  | MULTISPECIES: S-(hydroxymethyl)glutathione dehydrogenase/class III alcohol dehydrogenase [Proteobacteria] |
| 1_2135  | MULTISPECIES: VOC family protein [Proteobacteria]                                                         |
| 1_2136  | MULTISPECIES: DUF3422 domain-containing protein [Proteobacteria]                                          |
| 1_2137  | MULTISPECIES: S-formylglutathione hydrolase [Proteobacteria]                                              |
| 1_2138  | MULTISPECIES: NAD(P)/FAD-dependent oxidoreductase [Proteobacteria]                                        |
| 1_2139  | MULTISPECIES: replication-associated recombination protein A [Proteobacteria]                             |
| 1_2140  | MULTISPECIES: Na <sup>+</sup> /H <sup>+</sup> antiporter NhaA [Proteobacteria]                            |
| 1_2141  | MULTISPECIES: excinuclease ABC subunit UvrA [Proteobacteria]                                              |
| 1_2142  | MULTISPECIES: relaxase [Proteobacteria]                                                                   |
| 1_2143  | MULTISPECIES: hypothetical protein [Proteobacteria]                                                       |
| 1_2144  | MULTISPECIES: hypothetical protein [Proteobacteria]                                                       |
| 1_2145  | MULTISPECIES: DUF3742 domain-containing protein [Proteobacteria]                                          |
| 1_2146  | MULTISPECIES: conjugal transfer protein TraG [Proteobacteria]                                             |
| 1_2147  | MULTISPECIES: hypothetical protein [Pseudomonas]                                                          |

|        |                                                                                                  |
|--------|--------------------------------------------------------------------------------------------------|
| 1_2148 | MULTISPECIES: integrating conjugative element protein [Gammaproteobacteria]                      |
| 1_2149 | MULTISPECIES: TIGR03756 family integrating conjugative element protein [Proteobacteria]          |
| 1_2150 | MULTISPECIES: TIGR03757 family integrating conjugative element protein [Proteobacteria]          |
| 1_2151 | MULTISPECIES: hypothetical protein [Proteobacteria]                                              |
| 1_2152 | MULTISPECIES: DSBA oxidoreductase [Proteobacteria]                                               |
| 1_2153 | MULTISPECIES: conjugative transfer ATPase [Proteobacteria]                                       |
| 1_2154 | MULTISPECIES: TIGR03751 family conjugal transfer lipoprotein [Proteobacteria]                    |
| 1_2155 | MULTISPECIES: TIGR03752 family integrating conjugative element protein [Proteobacteria]          |
| 1_2156 | MULTISPECIES: TIGR03749 family integrating conjugative element protein [Proteobacteria]          |
| 1_2157 | MULTISPECIES: TIGR03746 family integrating conjugative element protein [Proteobacteria]          |
| 1_2158 | MULTISPECIES: TIGR03750 family conjugal transfer protein [Proteobacteria]                        |
| 1_2159 | MULTISPECIES: TIGR03745 family integrating conjugative element membrane protein [Proteobacteria] |
| 1_2160 | MULTISPECIES: TIGR03758 family integrating conjugative element protein [Proteobacteria]          |
| 1_2161 | MULTISPECIES: plasmid Ignore, RAQPRD family [Proteobacteria]                                     |
| 1_2162 | MULTISPECIES: TIGR03747 family integrating conjugative element membrane protein [Proteobacteria] |
| 1_2163 | MULTISPECIES: conjugative coupling factor TraD, PFGI-1 class [Proteobacteria]                    |
| 1_2164 | MULTISPECIES: integrating conjugative element protein [Proteobacteria]                           |
| 1_2165 | MULTISPECIES: lytic transglycosylase [Proteobacteria]                                            |
| 1_2166 | MULTISPECIES: TIGR03759 family integrating conjugative element protein [Proteobacteria]          |
| 1_2167 | MULTISPECIES: hypothetical protein [Proteobacteria]                                              |
| 1_2168 | MULTISPECIES: hypothetical protein [Proteobacteria]                                              |
| 1_2169 | MULTISPECIES: hypothetical protein [Proteobacteria]                                              |
| 1_2170 | MULTISPECIES: DEAD/DEAH box helicase [Gammaproteobacteria]                                       |
| 1_2171 | MULTISPECIES: hypothetical protein [Proteobacteria]                                              |
| 1_2172 | MULTISPECIES: hypothetical protein [Proteobacteria]                                              |
| 1_2173 | MULTISPECIES: SAM-dependent methyltransferase [Proteobacteria]                                   |
| 1_2174 | MULTISPECIES: hypothetical protein [Proteobacteria]                                              |
| 1_2175 | MULTISPECIES: hypothetical protein [Proteobacteria]                                              |
| 1_2176 | MULTISPECIES: hypothetical protein [Proteobacteria]                                              |
| 1_2177 | MULTISPECIES: hypothetical protein [Proteobacteria]                                              |
| 1_2178 | MULTISPECIES: DUF3275 domain-containing protein [Proteobacteria]                                 |

|        |                                                                                                                                                 |
|--------|-------------------------------------------------------------------------------------------------------------------------------------------------|
| 1_2179 | MULTISPECIES: DUF3577 domain-containing protein [Proteobacteria]                                                                                |
| 1_2180 | MULTISPECIES: DUF3085 domain-containing protein [Proteobacteria]                                                                                |
| 1_2181 | MULTISPECIES: hypothetical protein [Proteobacteria]                                                                                             |
| 1_2182 | MULTISPECIES: DUF2274 domain-containing protein [Proteobacteria]                                                                                |
| 1_2183 | MULTISPECIES: conjugative transfer protein TrbI [Proteobacteria]                                                                                |
| 1_2184 | MULTISPECIES: P-type conjugative transfer protein TrbG [Proteobacteria]                                                                         |
| 1_2185 | MULTISPECIES: conjugal transfer protein TrbF [Proteobacteria]                                                                                   |
| 1_2186 | MULTISPECIES: P-type conjugative transfer protein TrbL [Proteobacteria]                                                                         |
| 1_2187 | MULTISPECIES: hypothetical protein [Proteobacteria]                                                                                             |
| 1_2188 | MULTISPECIES: P-type conjugative transfer protein TrbJ [Proteobacteria]                                                                         |
| 1_2189 | MULTISPECIES: conjugal transfer protein TrbE [Proteobacteria]                                                                                   |
| 1_2190 | MULTISPECIES: conjugal transfer protein TrbD [Proteobacteria]                                                                                   |
| 1_2191 | MULTISPECIES: conjugal transfer protein TrbC [Proteobacteria]                                                                                   |
| 1_2192 | MULTISPECIES: P-type conjugative transfer ATPase TrbB [Proteobacteria]                                                                          |
| 1_2193 | MULTISPECIES: ribbon-helix-helix protein, CopG family [Proteobacteria]                                                                          |
| 1_2194 | MULTISPECIES: conjugal transfer protein TraG [Proteobacteria]                                                                                   |
| 1_2195 | MULTISPECIES: hypothetical protein [Proteobacteria]                                                                                             |
| 1_2196 | MULTISPECIES: hypothetical protein [Proteobacteria]                                                                                             |
| 1_2197 | hypothetical protein [Pseudomonas aeruginosa]                                                                                                   |
| 1_2198 | MULTISPECIES: QacE family quaternary ammonium compound efflux SMR transporter [Proteobacteria]                                                  |
| 1_2199 | MULTISPECIES: LysR family transcriptional regulator [Proteobacteria]                                                                            |
| 1_2200 | TolC family protein [Pseudomonas sp. NBRC 111127]                                                                                               |
| 1_2201 | MULTISPECIES: TetR/AcrR family transcriptional regulator [Proteobacteria]                                                                       |
| 1_2202 | MULTISPECIES: efflux RND transporter periplasmic adaptor subunit [Proteobacteria]                                                               |
| 1_2203 | MULTISPECIES: AcrB/AcrD/AcrF family protein [Proteobacteria]                                                                                    |
| 1_2204 | MULTISPECIES: DUF3313 domain-containing protein [Proteobacteria]                                                                                |
| 1_2205 | MULTISPECIES: ABC transporter permease [Proteobacteria]                                                                                         |
| 1_2206 | MULTISPECIES: ABC transporter ATP-binding protein [Proteobacteria]                                                                              |
| 1_2207 | MULTISPECIES: MCE family protein [Proteobacteria]                                                                                               |
| 1_2208 | MULTISPECIES: hypothetical protein [Proteobacteria]                                                                                             |
| 1_2209 | MULTISPECIES: DUF3363 domain-containing protein [Proteobacteria]                                                                                |
| 1_2210 | MULTISPECIES: peptidase [Proteobacteria]                                                                                                        |
| 1_2211 | MULTISPECIES: DUF2840 domain-containing protein [Proteobacteria]                                                                                |
| 1_2212 | chromosome partitioning protein ParB [Pseudomonas aeruginosa]                                                                                   |
| 1_2213 | MULTISPECIES: plasmid partitioning protein [Proteobacteria] or Chromosome (plasmid) partitioning protein ParA [Achromobacter xylooxidans]       |
| 1_2214 | MULTISPECIES: replication initiator and transcriptional regulator protein [Proteobacteria] or RepA replication protein [Pseudomonas aeruginosa] |
| 1_2215 | MULTISPECIES: DNA-binding protein [Proteobacteria]                                                                                              |

|        |                                                                                                                                                                       |
|--------|-----------------------------------------------------------------------------------------------------------------------------------------------------------------------|
| 1_2216 | MULTISPECIES: DUF2285 domain-containing protein [Proteobacteria]                                                                                                      |
| 1_2217 | MULTISPECIES: DUF2958 domain-containing protein [Bacteria]                                                                                                            |
| 1_2218 | MULTISPECIES: XRE family transcriptional regulator [Proteobacteria]                                                                                                   |
| 1_2219 | MULTISPECIES: DUF736 domain-containing protein [Proteobacteria]                                                                                                       |
| 1_2220 | MULTISPECIES: hypothetical protein [Proteobacteria]                                                                                                                   |
| 1_2221 | MULTISPECIES: hypothetical protein [Proteobacteria]                                                                                                                   |
| 1_2222 | MULTISPECIES: DUF945 domain-containing protein [Proteobacteria]                                                                                                       |
| 1_2223 | MULTISPECIES: hypothetical protein [Proteobacteria]                                                                                                                   |
| 1_2224 | MULTISPECIES: DUF2958 domain-containing protein [Proteobacteria]                                                                                                      |
| 1_2225 | MULTISPECIES: RadC-like protein [Proteobacteria]                                                                                                                      |
| 1_2226 | MULTISPECIES: ArsR family transcriptional regulator [Proteobacteria]                                                                                                  |
| 1_2227 | MULTISPECIES: arsenate reductase ArsC [Proteobacteria]                                                                                                                |
| 1_2228 | MULTISPECIES: arsenical-resistance protein [Proteobacteria]                                                                                                           |
| 1_2229 | MULTISPECIES: arsenate reductase (glutaredoxin) [Proteobacteria]                                                                                                      |
| 1_2230 | MULTISPECIES: arsenical resistance protein ArsH [Proteobacteria]                                                                                                      |
| 1_2231 | MULTISPECIES: hypothetical protein [Proteobacteria]                                                                                                                   |
| 1_2232 | MULTISPECIES: DUF1016 domain-containing protein [Proteobacteria]<>PREDICTED: uncharacterized protein LOC105828055 [Monomorium pharaonis]                              |
| 1_2233 | site-specific recombinase, phage integrase family [Bordetella bronchiseptica GA96-01] or tyrosine-based site-specific recombinase CMGI-2 [Pseudomonas sp. ATCC 13867] |
| 1_2234 | MULTISPECIES: hypothetical protein [Proteobacteria]                                                                                                                   |
| 1_2235 | MULTISPECIES: hypothetical protein [Proteobacteria]                                                                                                                   |
| 1_2236 | MULTISPECIES: hypothetical protein [Proteobacteria]                                                                                                                   |
| 1_2237 | MULTISPECIES: hypothetical protein [Proteobacteria]                                                                                                                   |
| 1_2238 | MULTISPECIES: hypothetical protein [Proteobacteria]                                                                                                                   |
| 1_2239 | MULTISPECIES: hypothetical protein [Proteobacteria]                                                                                                                   |
| 1_2240 | MULTISPECIES: DNA cytosine methyltransferase [Proteobacteria]                                                                                                         |
| 1_2241 | MULTISPECIES: DNA topoisomerase III [Proteobacteria]                                                                                                                  |
| 1_2242 | MULTISPECIES: single-stranded DNA-binding protein [Proteobacteria]                                                                                                    |
| 1_2243 | MULTISPECIES: DUF3158 domain-containing protein [Proteobacteria]                                                                                                      |
| 1_2244 | MULTISPECIES: TIGR03761 family integrating conjugative element protein [Proteobacteria]                                                                               |
| 1_2245 | MULTISPECIES: hypothetical protein [Proteobacteria]                                                                                                                   |
| 1_2246 | MULTISPECIES: DUF2857 domain-containing protein [Proteobacteria]                                                                                                      |
| 1_2247 | MULTISPECIES: hypothetical protein [Proteobacteria]                                                                                                                   |
| 1_2248 | MULTISPECIES: hypothetical protein [Proteobacteria]                                                                                                                   |
| 1_2249 | MULTISPECIES: ParA family protein [Proteobacteria]                                                                                                                    |
| 1_2250 | MULTISPECIES: AlpA family phage regulatory protein [Proteobacteria]                                                                                                   |
| 1_2251 | MULTISPECIES: hypothetical protein [Proteobacteria]                                                                                                                   |

**Table S2. MIC values of transformants carrying efflux pump genes**

| Strain                | MIC, mg/L |              |          |
|-----------------------|-----------|--------------|----------|
|                       | BAC       | Tetracycline | Rifampin |
| PA0509-PBBRMCS4       | 12.5      | 0.2          | 12.5     |
| PA0509/pBBRsugE-A* 25 |           | 0.2          | 12.5     |
| PA0509/pBBRsugE-B     | 12.5      | 0.2          | 12.5     |
| PA0509/pBBRABC        | 12.5      | 0.2          | 25       |

\* PA0509/pBBRsugE-A showed 89.65% reduction in growth at 12.5 mg of BAC/L only once out of three independent replicates. The other two replicates showed  $\leq 80\%$  growth reduction at 12.5 mg of BAC/L and  $\geq 80\%$  reduction in growth at 25 mg of BAC/L. Hence, 25 mg/L is reported in the Table for BAC.



**Table S3. | MIC of antibiotics for *P. aeruginosa* DP & DPB evolved populations.** (A) MIC of antibiotics in *P.aeruginosa* DP. (B) MIC of antibiotics in *P.aeruginosa* DPB. (C) MIC of antibiotics supplemented with BAC in *P.aeruginosa* DPB.

**A**

| Populations                          | MIC, mg/L    |               |                 |           |          |            |
|--------------------------------------|--------------|---------------|-----------------|-----------|----------|------------|
|                                      | Tetracycline | Ciprofloxacin | Chloramphenicol | Kanamycin | Rifampin | Ampicillin |
| <i>P. aeruginosa</i> DP<br>BAC(+)_1  | 12.5         | 0.4           | 25              | > 400     | 25       | 3200       |
| <i>P. aeruginosa</i> DP<br>BAC(+)_2  | 12.5         | < 0.1         | 25              | 50        | 6.25     | 400        |
| <i>P. aeruginosa</i> DP<br>BAC(+)_3  | 12.5         | < 0.1         | 50              | 100       | 25       | 1600       |
| <i>P. aeruginosa</i> DP<br>Control_1 | 6.25         | < 0.1         | 50              | 100       | 25       | 1600       |
| <i>P. aeruginosa</i> DP<br>BAC(-)_1  | 6.25         | 0.025         | < 12.5          | 400       | 6.25     | 6400       |
| <i>P. aeruginosa</i> DP<br>BAC(-)_2  | 3.2          | 0.1           | 25              | 100       | < 3.2    | 100        |
| <i>P. aeruginosa</i> DP<br>BAC(-)_3  | 12.5         | 0.8           | 200             | 200       | 12.5     | 3200       |
| <i>P. aeruginosa</i> DP<br>ancestor  | 12.5         | 0.1           | 50              | 100       | 12.5     | 3200       |
| <i>P. aeruginosa</i> DP<br>Control_2 | 6.25         | 0.1           | 50              | 100       | 12.5     | 1600       |

**B**

| populations                           | MIC, mg/L    |               |                 |             |           |          |            |
|---------------------------------------|--------------|---------------|-----------------|-------------|-----------|----------|------------|
|                                       | Tetracycline | Ciprofloxacin | Chloramphenicol | Polymyxin B | Kanamycin | Rifampin | Ampicillin |
| <i>P. aeruginosa</i> DPB<br>BAC(+)_1  | 12.5         | 0.2           | 50              | 0.8         | 200       | 25       | 12800      |
| <i>P. aeruginosa</i> DPB<br>BAC(+)_2  | 3.125        | 0.2           | 25              | 0.2         | 50        | 6.25     | 400        |
| <i>P. aeruginosa</i> DPB<br>BAC(+)_3  | 12.5         | 0.2           | 50              | 0.4         | 100       | 25       | 3200       |
| <i>P. aeruginosa</i> DPB<br>BAC(-)_1  | 6.25         | < 0.1         | 50              | 0.4         | 200       | 25       | 6400       |
| <i>P. aeruginosa</i> DPB<br>BAC(-)_2  | 6.25         | 0.1           | 12.5            | 0.4         | 50        | 12.5     | < 200      |
| <i>P. aeruginosa</i> DPB<br>BAC(-)_3  | 12.5         | 0.2           | 50              | 0.4         | 100       | 25       | 1600       |
| <i>P. aeruginosa</i> DPB<br>ancestor  | 6.25         | 0.2           | 100             | 0.2         | 100       | 25       | 3200       |
| <i>P. aeruginosa</i> DPB<br>Control_1 | 12.5         | 0.4           | 100             | 0.4         | 100       | 25       | 3200       |
| <i>P. aeruginosa</i> DPB<br>Control_2 | 6.25         | 0.2           | 50              | 0.4         | 100       | 12.5     | 3200       |

**C**

| populations<br>(LB+BAC<br>cultured)      | MIC, mg/L                        |                             |                            |                           |                             |
|------------------------------------------|----------------------------------|-----------------------------|----------------------------|---------------------------|-----------------------------|
|                                          | Chloramphenicol<br>+BAC(100mg/L) | Polymyxin<br>B+BAC(100mg/L) | Kanamycin+BAC(100<br>mg/L) | Rifampin+BAC(100<br>mg/L) | Ampicillin+BAC(100<br>mg/L) |
| <i>P. aeruginosa</i><br>DPB<br>BAC(+)_1  | 100                              | 0.8                         | 200                        | 6.25                      | 6400                        |
| <i>P. aeruginosa</i><br>DPB<br>BAC(+)_2  | 25                               | 0.4                         | 50                         | 6.25                      | < 200                       |
| <i>P. aeruginosa</i><br>DPB<br>BAC(+)_3  | 25                               | 0.4                         | 50                         | < 3.2                     | 3200                        |
| <i>P. aeruginosa</i><br>DPB ancestor     | 50                               | 0.4                         | 200                        | < 3.2                     | 6400                        |
| <i>P. aeruginosa</i><br>DPB<br>Control_1 | 50                               | 0.2                         | 200                        | < 3.2                     | 6400                        |

**Table S4A. Details of SNP mutations in *P. aeruginosa* DP evolved populations.** Mutations observed in control populations were removed to consider long-term exposure of LB media effect. Gray shading indicates populations with a mutation.

| Contig  | Annotation            | Gene<br>position<br>(Contig) | Mutation<br>in contig | Amino<br>acid<br>change | BAC(+)_1 | BAC(+)_2 | BAC(+)_3 | BAC(-)_1 | BAC(-)_2 | BAC(-)_3 |
|---------|-----------------------|------------------------------|-----------------------|-------------------------|----------|----------|----------|----------|----------|----------|
| Cont130 | tolQ-type transporter | 10,800                       | C→A                   | Glu →<br>Stop           |          |          |          |          |          |          |

|         |                                                                             |         |     |           |  |  |  |  |  |  |
|---------|-----------------------------------------------------------------------------|---------|-----|-----------|--|--|--|--|--|--|
| Cont130 | ribonuclease E                                                              | 5,273   | A→G | Silent    |  |  |  |  |  |  |
| Cont147 | Resistance-Nodulation-Cell Division (RND) multidrug efflux transporter MexD | 66,759  | T→C | Asn → Ser |  |  |  |  |  |  |
| Cont147 | Resistance-Nodulation-Cell Division (RND) multidrug efflux transporter MexD | 65,685  | A→C | Val → Gly |  |  |  |  |  |  |
| Cont174 | Type III secretion outer membrane protein PopN precursor                    | 100,586 | C→T | Silent    |  |  |  |  |  |  |
| Cont246 | hypothetical protein H123_32466, partial                                    | 25      | A→G | Silent    |  |  |  |  |  |  |
| Cont41  | hemagglutination protein, partial                                           | 52,142  | G→A | Silent    |  |  |  |  |  |  |
| Cont53  | PmrB: two-component regulator system signal sensor kinase PmrB              | 8,288   | A→G | Phe → Leu |  |  |  |  |  |  |
| Cont53  | PmrB: two-component regulator system signal sensor kinase PmrB              | 8,636   | T→C | Met → Val |  |  |  |  |  |  |
| Cont94  | aluminum activated malate transporter family protein                        | 33,856  | G→A | Thr → Ile |  |  |  |  |  |  |

|         |                                                                                                                                                                 |         |     |               |  |  |  |  |  |  |
|---------|-----------------------------------------------------------------------------------------------------------------------------------------------------------------|---------|-----|---------------|--|--|--|--|--|--|
| Cont188 | Full=UDP-3-O-[3-hydroxymyristoyl] N-acetylglucosamine deacetylase; AltName: Full=Protein EnvA; AltName: Full=UDP-3-O-acyl-GlcNAc deacetylase                    | 80,476  | A→T | Leu →<br>Gln  |  |  |  |  |  |  |
| Cont188 | Full=RNA polymerase sigma-54 factor                                                                                                                             | 134,734 | T→A | Trp →<br>Arg  |  |  |  |  |  |  |
| Cont240 | hypothetical protein of bacteriophage Pfl                                                                                                                       | 739     | C→T | Silent        |  |  |  |  |  |  |
| Cont245 | glycoprotein, partial                                                                                                                                           | 1,247   | C→T | Ala →<br>Thr  |  |  |  |  |  |  |
| Cont224 | glycoprotein, partial                                                                                                                                           | 1,031   | G→A | Silent        |  |  |  |  |  |  |
| Cont55  | hypothetical protein PA0943                                                                                                                                     | 63,040  | G→C | Tyr →<br>Stop |  |  |  |  |  |  |
| Cont55  | lipopolysaccharide biosynthetic protein LpxO2                                                                                                                   | 58,466  | G→C | Arg →<br>Gly  |  |  |  |  |  |  |
| Cont99  | Full=DNA-directed RNA polymerase subunit alpha; Short=RNAP subunit alpha; AltName: Full=RNA polymerase subunit alpha; AltName: Full=Transcriptase subunit alpha | 13,252  | C→G | Leu →<br>Val  |  |  |  |  |  |  |

|         |                                                                                                                                                        |        |     |           |  |  |  |  |  |  |
|---------|--------------------------------------------------------------------------------------------------------------------------------------------------------|--------|-----|-----------|--|--|--|--|--|--|
| Cont195 | transposase insM for insertion sequence element IS600                                                                                                  | 625    | G→A | Silent    |  |  |  |  |  |  |
| Cont195 | transposase insM for insertion sequence element IS600                                                                                                  | 1,180  | A→G | Silent    |  |  |  |  |  |  |
| Cont195 | transposase insM for insertion sequence element IS600                                                                                                  | 903    | A→G | Lys → Arg |  |  |  |  |  |  |
| Cont210 | alpha-1,6-rhamnosyltransferase                                                                                                                         | 12,406 | A→C | His → Pro |  |  |  |  |  |  |
| Cont44  | hypothetical protein PA3904                                                                                                                            | 10,230 | G→A | Silent    |  |  |  |  |  |  |
| Cont85  | RecName: Full=Chaperone SurA; AltName: Full=Peptidyl-prolyl cis-trans isomerase SurA; Short=PPIase SurA; AltName: Full=Rotamase SurA; Flags: Precursor | 67,351 | T→G | Thr → Pro |  |  |  |  |  |  |
|         | RecName: Full=Chaperone SurA; AltName: Full=Peptidyl-prolyl cis-trans isomerase SurA; Short=PPIase SurA; AltName: Full=Rotamase SurA; Flags: Precursor | 21,278 | C→T | Silent    |  |  |  |  |  |  |

|         |                                                       |        |     |           |  |  |  |  |  |  |
|---------|-------------------------------------------------------|--------|-----|-----------|--|--|--|--|--|--|
| Cont142 | lipopolysaccharide biosynthetic protein LpxO1         | 12,214 | A→G | His → Arg |  |  |  |  |  |  |
| Cont165 | peptidase S41                                         | 67,419 | G→A | Gly → Ser |  |  |  |  |  |  |
| Cont56  | type IV secretion protein Rhs                         | 1,398  | T→C | Silent    |  |  |  |  |  |  |
| Cont84  | RecName: Full=Denitrification regulatory protein NirQ | 3,964  | G→A | Silent    |  |  |  |  |  |  |

**Table S4B. Details of SNP mutations in *P. aeruginosa* DPB evolved populations.** Mutations observed in control populations were removed to consider long-term exposure of LB media effect. Gray shading indicates populations with a mutation.

| Contig  | Annotation                                                     | Gene position (Contig) | Mutation in contig | Amino acid change | BAC(+)_1 | BAC(+)_2 | BAC(+)_3 | BAC(-)_1 | BAC(-)_2 | BAC(-)_3 |
|---------|----------------------------------------------------------------|------------------------|--------------------|-------------------|----------|----------|----------|----------|----------|----------|
| Cont110 | two-component response regulator CbrB                          | 38,368                 | T→C                | Ile→Thr           |          |          |          |          |          |          |
| Cont110 | PmrB: two-component regulator system signal sensor kinase PmrB | 94,923                 | G→A                | Val→Ile           |          |          |          |          |          |          |
| Cont110 | PmrB: two-component regulator system signal sensor kinase PmrB | 95,407                 | T→C                | Leu→Pro           |          |          |          |          |          |          |
| Cont110 | PmrB: two-component regulator system signal sensor kinase PmrB | 95,266                 | G→C                | Gly→Ala           |          |          |          |          |          |          |
| Cont64  | glycoprotein, partial                                          | 21,505                 | C→G                | Silent            |          |          |          |          |          |          |

|         |                                                                                                                                                            |         |     |          |  |  |  |  |  |  |
|---------|------------------------------------------------------------------------------------------------------------------------------------------------------------|---------|-----|----------|--|--|--|--|--|--|
| Cont67  | cbb3-type cytochrome c oxidase subunit 1                                                                                                                   | 149,131 | C→G | Silent   |  |  |  |  |  |  |
| Cont67  | cbb3-type cytochrome c oxidase subunit 1                                                                                                                   | 149,266 | C→G | Silent   |  |  |  |  |  |  |
| Cont77  | serine protease MucD                                                                                                                                       | 61,376  | A→G | Val→Ala  |  |  |  |  |  |  |
| Cont98  | hemagglutination protein, partial                                                                                                                          | 52,144  | G→A | Silent   |  |  |  |  |  |  |
| Cont98  | hemagglutination protein, partial                                                                                                                          | 52,205  | C→A | Pro→Lys  |  |  |  |  |  |  |
| Cont98  | hemagglutination protein, partial                                                                                                                          | 52,206  | C→A |          |  |  |  |  |  |  |
| Cont104 | RecName: Full=Multidrug efflux pump subunit AcrB; AltName: Full=AcrAB-ToIC multidrug efflux pump subunit AcrB; AltName: Full=Acridine resistance protein B | 367     | C→G | Silent   |  |  |  |  |  |  |
| Cont52  | pyoverdine sidechain peptide synthetase, partial                                                                                                           | 87      | C→G | Silent   |  |  |  |  |  |  |
| Cont108 | mammalian cell entry protein                                                                                                                               | 19,461  | C→A | Asp→Tyr  |  |  |  |  |  |  |
| Cont112 | Carbamoyltransferase in large core OS assembly cluster                                                                                                     | 84,231  | T→G | Asp→Ala  |  |  |  |  |  |  |
| Cont43  | TetR family transcriptional regulator                                                                                                                      | 217,693 | G→A | Gln→Stop |  |  |  |  |  |  |



|        |                                                                                                                                              |         |     |          |  |  |  |  |  |  |
|--------|----------------------------------------------------------------------------------------------------------------------------------------------|---------|-----|----------|--|--|--|--|--|--|
| Cont85 | chloramphenicol acetyltransferase                                                                                                            | 23,702  | A→C | Thr→Pro  |  |  |  |  |  |  |
| Cont75 | MULTISPECIES: dehydrogenase [Pseudomonas], hypothetical protein PA0943 [Pseudomonas aeruginosa PAO1]                                         | 28,392  | G→A | Trp→Stop |  |  |  |  |  |  |
| Cont92 | Full=UDP-3-O-[3-hydroxymyristoyl] N-acetylglucosamine deacetylase; AltName: Full=Protein EnvA; AltName: Full=UDP-3-O-acyl-GlcNAc deacetylase | 94,358  | A→G | Ile→Thr  |  |  |  |  |  |  |
| Cont27 | outer membrane protein assembly complex, YaeT protein                                                                                        | 75,983  | T→C | Gln→Arg  |  |  |  |  |  |  |
| Cont27 | phosphoesterase                                                                                                                              | 481,483 | A→C | Thr→Pro  |  |  |  |  |  |  |
| Cont42 | RecName: Full=Protease HtpX; AltName: Full=Heat shock protein HtpX                                                                           | 290,119 | A→G | Ser→Pro  |  |  |  |  |  |  |

**Table S4C. Details of DIP (deletion, insertion and other polymorphisms) mutations in *P. aeruginosa* DP evolved populations.** Mutations observed in control populations were removed to consider long-term exposure of LB media effect. Gray shading indicates populations with a mutation.

| Contig  | Annotation                                                                                                                                                       | Gene position (Contig) | Mutation in contig | BAC(+)_1 | BAC(+)_2 | BAC(+)_3 | BAC(-)_1 | BAC(-)_2 | BAC(-)_3 |
|---------|------------------------------------------------------------------------------------------------------------------------------------------------------------------|------------------------|--------------------|----------|----------|----------|----------|----------|----------|
| Cont130 | tolQ-type transporter                                                                                                                                            | 10,940                 | +TGGCGG            |          |          |          |          |          |          |
| Cont174 | RecName: Full=Uroporphyrinogen-III C-methyltransferase; Short=Urogen III methylase; AltName: Full=SUMT; AltName: Full=Uroporphyrinogen III methylase; Short=UROM | 25,207                 | Δ36 bp             |          |          |          |          |          |          |
| Cont125 | peptidase S41                                                                                                                                                    | 1,654                  | G→.                |          |          |          |          |          |          |
| Cont125 | peptidase S41                                                                                                                                                    | 1,537                  | +A                 |          |          |          |          |          |          |
| Cont181 | enoyl-CoA hydratase                                                                                                                                              | 1,397                  | Δ40 bp (large del) |          |          |          |          |          |          |
| Cont38  | TetR family transcriptional regulator                                                                                                                            | 18,939                 | 191 bp x 2         |          |          |          |          |          |          |
| Cont16  | sugar-binding protein                                                                                                                                            | 19,119                 | A→.                |          |          |          |          |          |          |
| Cont162 | hydrogenase expression protein HypA, multidrug efflux protein, RND efflux system, inner membrane transporter CmeB                                                | 21,318                 | Δ387 bp            |          |          |          |          |          |          |
| Cont162 | hemolysin D, periplasmic multidrug efflux lipoprotein, RND multidrug efflux membrane fusion protein                                                              | 19,001                 | C→.                |          |          |          |          |          |          |

|         |                                                                                    |         |        |  |  |  |  |  |  |
|---------|------------------------------------------------------------------------------------|---------|--------|--|--|--|--|--|--|
|         | precursor, RND efflux system, membrane fusion protein CmeA                         |         |        |  |  |  |  |  |  |
| Cont184 | phosphatidylglycerophosphate A                                                     | 767     | Δ6 bp  |  |  |  |  |  |  |
| Cont19  | acyl-CoA dehydrogenase                                                             | 4,225   | G→.    |  |  |  |  |  |  |
| Cont19  | acyl-CoA dehydrogenase                                                             | 4,226   | C→.    |  |  |  |  |  |  |
| Cont67  | PhoP/Q and low Mg <sup>2+</sup> inducible outer membrane protein H1                | 857     | Δ8 bp  |  |  |  |  |  |  |
| Cont201 | lipopolysaccharide B-band O-antigen biosynthesis protein                           | 29,039  | G→.    |  |  |  |  |  |  |
| Cont58  | RecName: Full=Transcriptional activator protein LasR [Pseudomonas aeruginosa PAO1] | 29,332  | +15 bp |  |  |  |  |  |  |
| Cont42  | RecName: Full=DNA mismatch repair protein MutS                                     | 46,203  | +9 bp  |  |  |  |  |  |  |
| Cont42  | spermidine dehydrogenase, SpdH                                                     | 148,787 | +C     |  |  |  |  |  |  |

**Table S4D. Details of DIP (deletion, insertion and other polymorphisms) mutations in *P. aeruginosa* DPB evolved populations.** Mutations observed in control populations were removed to consider long-term exposure of LB media effect. Black shading indicates populations with a mutation.

| Contig  | Annotation                                                                                    | Gene position (Contig) | Mutation in contig | BAC(+)_1 | BAC(+)_2 | BAC(+)_3 | BAC(-)_1 | BAC(-)_2 | BAC(-)_3 |
|---------|-----------------------------------------------------------------------------------------------|------------------------|--------------------|----------|----------|----------|----------|----------|----------|
| Cont110 | PmrA: two-component regulator system response regulator PmrA                                  | 94,728                 | +20 bp             |          |          |          |          |          |          |
| Cont98  | Full=TPR repeat-containing protein PA4667                                                     | 6,631                  | Δ4 bp              |          |          |          |          |          |          |
| Cont48  | CDP-diacylglycerol--glycerol-3-phosphate 3-phosphatidyltransferase                            | 164,191                | +12bp              |          |          |          |          |          |          |
| Cont112 | histidine kinase                                                                              | 27,735                 | Δ9 bp              |          |          |          |          |          |          |
| Cont112 | histidine kinase                                                                              | 27,867                 | Δ9 bp              |          |          |          |          |          |          |
| Cont115 | peptidase S41                                                                                 | 44,082                 | G→.                |          |          |          |          |          |          |
| Cont43  | TetR family transcriptional regulator                                                         | 217,721                | +G                 |          |          |          |          |          |          |
| Cont85  | Full=Chloramphenicol acetyltransferase; AltName: Full=Xenobiotic acetyltransferase; Short=XAT | 22,185                 | Δ1,817 bp          |          |          |          |          |          |          |
| Cont118 | O-antigen acetylase                                                                           | 68,790                 | +G                 |          |          |          |          |          |          |
| Cont118 | O-antigen acetylase                                                                           | 70,620                 | C→.                |          |          |          |          |          |          |
| Cont92  | alpha-galactosidase                                                                           | 14,273                 | +C                 |          |          |          |          |          |          |
| Cont92  | RecName: Full=60 kDa chaperonin; AltName: Full=GroEL protein;                                 | 71,372                 | Δ36 bp             |          |          |          |          |          |          |

|         |                                                                                                      |         |            |  |  |  |  |  |  |
|---------|------------------------------------------------------------------------------------------------------|---------|------------|--|--|--|--|--|--|
|         | AltName: Full=Protein Cpn60                                                                          |         |            |  |  |  |  |  |  |
| Cont96  | RecName: Full=Cytochrome c551 peroxidase; Short=CCP; Short=Cytochrome c peroxidase; Flags: Precursor | 50,169  | Δ32 bp     |  |  |  |  |  |  |
| Cont72  | two-component sensor PhoQ                                                                            | 226,316 | Δ92 bp     |  |  |  |  |  |  |
| Cont123 | nonCDS                                                                                               | 804     | 219 bp x 2 |  |  |  |  |  |  |
| Cont55  | TonB-dependent receptor                                                                              | 7,536   | +GCGCTGG   |  |  |  |  |  |  |

**Table S5. Subpopulational mutations in *pmrB* and *pmrA* in *P. aeruginosa* DP BAC(-) populations (Breseq polymorphism mode).**

| Comparison                        | Contig | Annotation  | Gene position (Contig) | Mutation in contig | Amino acid change                        | frequency |
|-----------------------------------|--------|-------------|------------------------|--------------------|------------------------------------------|-----------|
| BAC(-)_2_reads_vs_ancestor_contig | Cont53 | <i>pmrA</i> | 10,036                 | G→C                | L(ancestor and BAC(+)_2) 59 V(BAC(-)_2)  | 26.80%    |
|                                   |        | <i>pmrB</i> | 8,872                  | Δ7 bp              |                                          | 7.10%     |
|                                   |        | <i>pmrB</i> | 8,249                  | C→T                | G(ancestor and BAC(+)_2) 421 S(BAC(-)_2) | 55.80%    |
| BAC(-)_3_reads_vs_ancestor_contig |        | <i>pmrB</i> | 9,449                  | A→G                | F(ancestor and BAC(+)_3) 21 V(BAC(-)_3)  | 55.20%    |



**Table S6A. Mean transcript abundance and log<sub>2</sub> fold change of *arnBCADTEF* under BAC free condition (only LB) in *P. aeruginosa* DPB populations. AL: *P. aeruginosa* DPB ancestor in LB growth media; C2L: *P. aeruginosa* DPB\_Control\_2 in LB; BAC(+)\_1L: *P. aeruginosa* DPB\_BAC(+)\_1 in LB; BAC(+)\_2L: *P. aeruginosa* DPB BAC(+)\_2 in LB; BAC(+)\_3L: *P. aeruginosa* DPB BAC(+)\_3 in LB.**

| <b>AL_vs_C2L</b>       |                       |              |                 |             |
|------------------------|-----------------------|--------------|-----------------|-------------|
|                        | <b>log2FoldChange</b> | <b>lfcSE</b> | <b>baseMean</b> | <b>padj</b> |
| <i>arnB</i>            | -0.19                 | 0.465671379  | 2881.36         | 0.95        |
| <i>arnC</i>            | -0.39                 | 0.47302977   | 1451.45         | 0.86        |
| <i>arnA</i>            | -0.42                 | 0.500156202  | 1981.62         | 0.85        |
| <i>arnD</i>            | -0.13                 | 0.501352141  | 46.85           | 0.97        |
| <i>arnT (partial)</i>  | -0.13                 | 0.442507489  | 41.99           | 0.97        |
| <i>arnT (partial)</i>  | -0.33                 | 0.49133792   | 7.30            | 0.91        |
| <i>arnE</i>            | -0.52                 | 0.404176235  | 0.62            | NA          |
| <i>arnF</i>            | -0.95                 | 0.492629556  | 0.91            | NA          |
| <b>AL_vs_BAC(+)_1L</b> |                       |              |                 |             |
|                        | <b>log2FoldChange</b> | <b>lfcSE</b> | <b>baseMean</b> | <b>padj</b> |
| <i>arnB</i>            | -0.73                 | 0.431743475  | 2405.79         | 0.53        |
| <i>arnC</i>            | -1.13                 | 0.472772597  | 1175.81         | 0.18        |
| <i>arnA</i>            | -0.59                 | 0.504809163  | 1886.49         | 0.78        |
| <i>arnD</i>            | 0.10                  | 0.554740919  | 52.12           | 0.99        |
| <i>arnT (partial)</i>  | 1.01                  | 0.519615554  | 75.69           | 0.39        |
| <i>arnT (partial)</i>  | 1.12                  | 0.524817195  | 15.96           | 0.29        |
| <i>arnE</i>            | 0.30                  | 0.618855137  | 1.57            | NA          |
| <i>arnF</i>            | 1.04                  | 0.612313641  | 3.52            | 0.53        |
| <b>AL_vs_BAC(+)_2L</b> |                       |              |                 |             |
|                        | <b>log2FoldChange</b> | <b>lfcSE</b> | <b>baseMean</b> | <b>padj</b> |
| <i>arnB</i>            | 0.32                  | 0.533642396  | 3428.44         | 0.91        |
| <i>arnC</i>            | -0.58                 | 0.569188667  | 1415.15         | 0.81        |
| <i>arnA</i>            | -0.55                 | 0.570356139  | 1988.36         | 0.82        |
| <i>arnD</i>            | 0.18                  | 0.594907641  | 52.14           | 0.97        |
| <i>arnT (partial)</i>  | 0.58                  | 0.540764554  | 53.92           | 0.78        |
| <i>arnT (partial)</i>  | 0.82                  | 0.584488374  | 11.75           | 0.63        |
| <i>arnE</i>            | 0.01                  | 0.693819434  | 1.24            | 1.00        |
| <i>arnF</i>            | -1.07                 | 0.71890835   | 1.07            | 0.60        |
| <b>AL_vs_BAC(+)_3L</b> |                       |              |                 |             |
|                        | <b>log2FoldChange</b> | <b>lfcSE</b> | <b>baseMean</b> | <b>padj</b> |
| <i>arnB</i>            | 0.46                  | 0.452365733  | 3609.00         | 0.60        |
| <i>arnC</i>            | 0.27                  | 0.482877747  | 1820.99         | 0.81        |
| <i>arnA</i>            | 0.73                  | 0.506073653  | 3138.40         | 0.41        |
| <i>arnD</i>            | 1.91                  | 0.517494933  | 128.36          | 0.00        |
| <i>arnT (partial)</i>  | 2.24                  | 0.432234197  | 134.41          | 0.00        |

|                       |      |             |       |      |
|-----------------------|------|-------------|-------|------|
| <i>arnT (partial)</i> | 2.70 | 0.456141305 | 36.24 | 0.00 |
| <i>arnE</i>           | 1.20 | 0.809027602 | 2.77  | 0.39 |
| <i>arnF</i>           | 1.38 | 0.728107695 | 3.82  | 0.23 |

**Table S6B. Mean transcript abundance and log<sub>2</sub> fold change of *arnBCADTEF* under BAC exposure (LB+BAC) in *P. aeruginosa* DPB populations.** AB: *P. aeruginosa* DPB ancestor in LB+BAC media; C2B: *P. aeruginosa* DPB Control\_2 in LB+BAC; BAC(+)\_1B: *P. aeruginosa* DPB BAC(+)\_1 in LB+BAC; BAC(+)\_2B: *P. aeruginosa* DPB BAC(+)\_2 in LB+BAC; BAC(+)\_3B: *P. aeruginosa* DPB BAC(+)\_3 in LB+BAC.

| AB_vs_C2B             |                             |             |          |      |
|-----------------------|-----------------------------|-------------|----------|------|
|                       | log <sub>2</sub> FoldChange | lfcSE       | baseMean | padj |
| <i>arnB</i>           | 0.09                        | 0.215104554 | 801.92   | 1.00 |
| <i>arnC</i>           | 0.12                        | 0.23495053  | 550.45   | 1.00 |
| <i>arnA</i>           | 0.01                        | 0.207432747 | 1599.01  | 1.00 |
| <i>arnD</i>           | -0.20                       | 0.327154778 | 43.52    | 1.00 |
| <i>arnT (partial)</i> | -0.01                       | 0.302074495 | 67.17    | 1.00 |
| <i>arnT (partial)</i> | -0.59                       | 0.415935123 | 12.70    | 0.84 |
| <i>arnE</i>           | 0.31                        | 0.404163246 | 0.97     | NA   |
| <i>arnF</i>           | 0.12                        | 0.453587471 | 1.20     | NA   |
| AB_vs_BAC(+)_1B       |                             |             |          |      |
|                       | log <sub>2</sub> FoldChange | lfcSE       | baseMean | padj |
| <i>arnB</i>           | 1.28                        | 0.23754236  | 1160.45  | 0.00 |
| <i>arnC</i>           | 1.36                        | 0.269060725 | 824.93   | 0.00 |
| <i>arnA</i>           | 1.45                        | 0.224670717 | 2606.73  | 0.00 |
| <i>arnD</i>           | 1.14                        | 0.31840902  | 65.64    | 0.00 |
| <i>arnT (partial)</i> | 1.79                        | 0.304537468 | 134.99   | 0.00 |
| <i>arnT (partial)</i> | 0.79                        | 0.435402146 | 19.35    | 0.24 |
| <i>arnE</i>           | 0.49                        | 0.730632955 | 0.87     | NA   |
| <i>arnF</i>           | 1.48                        | 0.727945525 | 2.56     | NA   |
| AB_vs_BAC(+)_2B       |                             |             |          |      |
|                       | log <sub>2</sub> FoldChange | lfcSE       | baseMean | padj |
| <i>arnB</i>           | 1.00                        | 0.294281292 | 1088.14  | 0.01 |
| <i>arnC</i>           | 1.24                        | 0.236915578 | 825.38   | 0.00 |
| <i>arnA</i>           | 1.14                        | 0.297513844 | 2395.02  | 0.00 |
| <i>arnD</i>           | 1.07                        | 0.395549988 | 69.30    | 0.05 |
| <i>arnT (partial)</i> | 1.61                        | 0.315054698 | 130.25   | 0.00 |
| <i>arnT (partial)</i> | 0.56                        | 0.396600845 | 18.63    | 0.45 |
| <i>arnE</i>           | -0.13                       | 0.586931586 | 0.37     | NA   |
| <i>arnF</i>           | 0.82                        | 0.73034847  | 1.74     | 0.59 |
| AB_vs_BAC(+)_3B       |                             |             |          |      |
|                       | log <sub>2</sub> FoldChange | lfcSE       | baseMean | padj |



|                       |      |             |         |      |
|-----------------------|------|-------------|---------|------|
| <i>arnB</i>           | 2.90 | 0.21317264  | 2516.05 | 0.00 |
| <i>arnC</i>           | 3.15 | 0.195491069 | 1989.37 | 0.00 |
| <i>arnA</i>           | 2.83 | 0.216985234 | 4967.34 | 0.00 |
| <i>arnD</i>           | 2.72 | 0.250158093 | 136.69  | 0.00 |
| <i>arnT</i> (partial) | 2.88 | 0.241083376 | 218.91  | 0.00 |
| <i>arnT</i> (partial) | 1.94 | 0.368403034 | 30.47   | 0.00 |
| <i>arnE</i>           | 1.84 | 0.828393669 | 1.90    | NA   |
| <i>arnF</i>           | 2.22 | 0.767476884 | 3.86    | 0.02 |

**Table S6C. Mean transcript abundance and log2 fold change of *arnBCADTEF* under BAC exposure (LB+BAC) in *P. aeruginosa* DPB BAC(-)\_1 and BAC(-)\_2 compared with their ancestor. AB: *P. aeruginosa* DPB ancestor in LB+BAC media; BAC(-)\_1B: *P. aeruginosa* DPB BAC(-)\_1 in LB+BAC; BAC(-)\_2B: *P. aeruginosa* DPB BAC(-)\_2 in LB+BAC.**

| <b>AB_vs_BAC(-)_1B</b> |                       |              |                 |             |
|------------------------|-----------------------|--------------|-----------------|-------------|
|                        | <b>log2FoldChange</b> | <b>lfcSE</b> | <b>baseMean</b> | <b>padj</b> |
| <i>arnB</i>            | 0.09                  | 0.219384811  | 782.96          | 0.87        |
| <i>arnC</i>            | 0.44                  | 0.222862261  | 607.57          | 0.20        |
| <i>arnA</i>            | 0.12                  | 0.2186852    | 1623.17         | 0.83        |
| <i>arnD</i>            | 0.03                  | 0.279480605  | 46.49           | 0.97        |
| <i>arnT</i> (partial)  | 0.12                  | 0.267812697  | 69.08           | 0.87        |
| <i>arnT</i> (partial)  | -0.09                 | 0.411952553  | 15.07           | 0.93        |
| <i>arnE</i>            | -0.12                 | 0.396253441  | 0.37            | NA          |
| <i>arnF</i>            | 0.14                  | 0.564593045  | 1.13            | NA          |
| <b>AB_vs_BAC(-)_2B</b> |                       |              |                 |             |
|                        | <b>log2FoldChange</b> | <b>lfcSE</b> | <b>baseMean</b> | <b>padj</b> |
| <i>arnB</i>            | 1.17                  | 0.206620442  | 1439.22         | 0.00        |
| <i>arnC</i>            | 1.72                  | 0.205238777  | 1295.33         | 0.00        |
| <i>arnA</i>            | 1.35                  | 0.203125098  | 3225.66         | 0.00        |
| <i>arnD</i>            | 1.19                  | 0.265657064  | 88.47           | 0.00        |
| <i>arnT</i> (partial)  | 1.52                  | 0.240119011  | 151.20          | 0.00        |
| <i>arnT</i> (partial)  | 0.80                  | 0.359723774  | 25.34           | 0.09        |
| <i>arnE</i>            | 0.48                  | 0.794701467  | 0.88            | NA          |
| <i>arnF</i>            | 1.91                  | 0.705407602  | 4.46            | 0.03        |

**Table S7. Statistics of RNA-seq libraries.** BAC(+)\_2L\_3 library was excluded for the analysis

|                     | <b>Total trimmed reads</b> | <b>Minimum trimmed read length</b> | <b>Maximum trimmed read length</b> | <b>Mean trimmed read length</b> | <b>rRNA ratio (%)</b> | <b>non rRNA ratio (%)</b> |
|---------------------|----------------------------|------------------------------------|------------------------------------|---------------------------------|-----------------------|---------------------------|
| <b>AB_1</b>         | 4356082                    | 50                                 | 251                                | 149                             | 1.44                  | 98.56                     |
| <b>AB_2</b>         | 8141140                    | 50                                 | 151                                | 129                             | 2.14                  | 97.86                     |
| <b>AB_3</b>         | 7539488                    | 50                                 | 151                                | 129                             | 0.79                  | 99.21                     |
| <b>AL_1</b>         | 4011862                    | 50                                 | 251                                | 150                             | 0.7                   | 99.3                      |
| <b>AL_2</b>         | 6164494                    | 50                                 | 151                                | 114                             | 0.83                  | 99.17                     |
| <b>AL_3</b>         | 7641790                    | 50                                 | 151                                | 129                             | 0.86                  | 99.14                     |
| <b>Control_2B_1</b> | 8957926                    | 50                                 | 151                                | 129                             | 1.36                  | 98.64                     |
| <b>Control_2B_2</b> | 7750548                    | 50                                 | 151                                | 129                             | 1.11                  | 98.89                     |
| <b>Control_2B_3</b> | 7685440                    | 50                                 | 151                                | 129                             | 2.16                  | 97.84                     |
| <b>Control_2L_1</b> | 2741210                    | 50                                 | 251                                | 167                             | 0.66                  | 99.34                     |
| <b>Control_2L_2</b> | 9891682                    | 50                                 | 151                                | 128                             | 1.04                  | 98.96                     |
| <b>Control_2L_3</b> | 7469324                    | 50                                 | 151                                | 127                             | 43.18                 | 56.82                     |
| <b>BAC(-)_1B_1</b>  | 8025500                    | 50                                 | 151                                | 127                             | 1.44                  | 98.56                     |
| <b>BAC(-)_1B_2</b>  | 10073768                   | 50                                 | 151                                | 132                             | 1.31                  | 98.69                     |
| <b>BAC(-)_1B_3</b>  | 6256866                    | 50                                 | 151                                | 128                             | 11.67                 | 88.33                     |
| <b>BAC(-)_2B_1</b>  | 8949960                    | 50                                 | 151                                | 131                             | 0.64                  | 99.36                     |
| <b>BAC(-)_2B_2</b>  | 10280386                   | 50                                 | 151                                | 132                             | 2.45                  | 97.55                     |
| <b>BAC(-)_2B_3</b>  | 7658090                    | 50                                 | 151                                | 131                             | 1.6                   | 98.4                      |
| <b>BAC(+)_1B_1</b>  | 2461204                    | 50                                 | 251                                | 130                             | 1.4                   | 98.6                      |
| <b>BAC(+)_1B_2</b>  | 10681356                   | 50                                 | 151                                | 130                             | 0.78                  | 99.22                     |
| <b>BAC(+)_1B_3</b>  | 7222502                    | 50                                 | 151                                | 127                             | 1.98                  | 98.02                     |
| <b>BAC(+)_1L_1</b>  | 3194068                    | 50                                 | 251                                | 141                             | 1.16                  | 98.84                     |
| <b>BAC(+)_1L_2</b>  | 6712958                    | 50                                 | 151                                | 129                             | 1.09                  | 98.91                     |
| <b>BAC(+)_1L_3</b>  | 6435280                    | 50                                 | 151                                | 117                             | 7.64                  | 92.36                     |
| <b>BAC(+)_2B_1</b>  | 3284808                    | 50                                 | 251                                | 138                             | 1.03                  | 98.97                     |
| <b>BAC(+)_2B_2</b>  | 7898444                    | 50                                 | 151                                | 129                             | 3.04                  | 96.96                     |
| <b>BAC(+)_2B_3</b>  | 8581008                    | 50                                 | 151                                | 131                             | 0.81                  | 99.19                     |
| <b>BAC(+)_2L_1</b>  | 4010854                    | 50                                 | 251                                | 146                             | 1.31                  | 98.69                     |
| <b>BAC(+)_2L_2</b>  | 6788752                    | 50                                 | 151                                | 124                             | 4.3                   | 95.7                      |
| <b>BAC(+)_2L_3</b>  | 7386410                    | 50                                 | 151                                | 127                             | 90.58                 | 9.42                      |
| <b>BAC(+)_3B_1</b>  | 3123668                    | 50                                 | 251                                | 136                             | 3.53                  | 96.47                     |
| <b>BAC(+)_3B_2</b>  | 6892426                    | 50                                 | 151                                | 129                             | 0.79                  | 99.21                     |
| <b>BAC(+)_3B_3</b>  | 7881554                    | 50                                 | 151                                | 130                             | 0.46                  | 99.54                     |
| <b>BAC(+)_3L_1</b>  | 4514160                    | 50                                 | 251                                | 144                             | 0.73                  | 99.27                     |
| <b>BAC(+)_3L_2</b>  | 9863122                    | 50                                 | 151                                | 125                             | 1                     | 99                        |
| <b>BAC(+)_3L_3</b>  | 5876808                    | 50                                 | 151                                | 126                             | 0.68                  | 99.32                     |
